# Supplementary material for: Synthetic and computational investigation of neighboring group participation by a nucleophilic disulfide bond
Source: Royal Society of Chemistry journal article supplement (doi:10.1039/d2ob01574a), 2022-11-18
Supplement: d2ob01574a1.pdf [file d2ob01574a1.pdf]

Electronic Supplementary Information

Synthetic and Computational Investigation of Neighboring  
Group Participation by Nucleophilic Disulfide Bond

Takuhei Yamamoto<sup>ab\*</sup>, Koki Fukuta<sup>a</sup>, Yuki Kariya<sup>a</sup>, Taiki Matsuura<sup>a</sup>, Hiroaki Hagiwara<sup>c</sup>, Bunji  
Uno<sup>d</sup>, Yukihiro Esaka<sup>ab</sup>

- a. Gifu Pharmaceutical University, 1-25-4, Daigaku-nishi, Gifu 501-1196, Japan
- b. United Graduate School of Drug Discovery and Medical Information Science, Gifu University, 1-1 Yanai-do, Gifu 501-1194, Japan
- c. Department of Chemistry, Faculty of Education, Gifu University, Yanai-do 1-1, Gifu 501-1193, Japan
- d. Faculty of Pharmacy, Gifu University of Medical Science, 4-3-3 Nijigaoka, Kani, Gifu 509-0923, Japan

E-mail: yamamotot@gifu-pu.ac.jp

## Table of Contents

|                                                                            |     |
|----------------------------------------------------------------------------|-----|
| 1. Experimental procedures and compound data                               | S3  |
| 2. NMR spectra                                                             | S6  |
| 3. Analysis of the isocyanate intermediate after the Curtius rearrangement | S12 |
| 4. Crystallographic data                                                   | S13 |
| 5. DFT studies                                                             | S15 |
| 6. References                                                              | S23 |

## Experimental Section

All reagents were purchased from Tokyo Chemical Inc. and were used without further purification unless otherwise stated. All solvents and hydrochloric acid were purchased from Nacalai Tesque. Column chromatography was performed using Nacalai Tesque Silica gel 60 (70~230 mesh). All reactions were carried under nitrogen unless otherwise stated. NMR spectra were recorded on a JEOL ECA-400. Chemical shifts were reported as the delta scale in ppm relative to tetramethylsilane ( $\delta = 0.00$  ppm) for  $^1\text{H}$  NMR and  $\text{CDCl}_3$  ( $\delta = 77.0$  ppm) for  $^{13}\text{C}$  NMR. IR absorption spectra were recorded on a PerkinElmer FT-IR Frontier MIR spectrometer. All melting points are uncorrected and were recorded on a SANSYO SMP-300 melting point apparatus. X-ray diffraction data were collected by a Rigaku AFC7R Mercury CCD diffractometer using graphite monochromated Mo  $K\alpha$  radiation ( $\lambda = 0.71075 \text{ \AA}$ ) operated at 5 kW power (50 kV, 100 mA) at Institute for Molecular Science (IMS), Okazaki, Japan.

## Model compound preparation

### 4-(methylsulfanyl)butanoic acid (2-COOH)

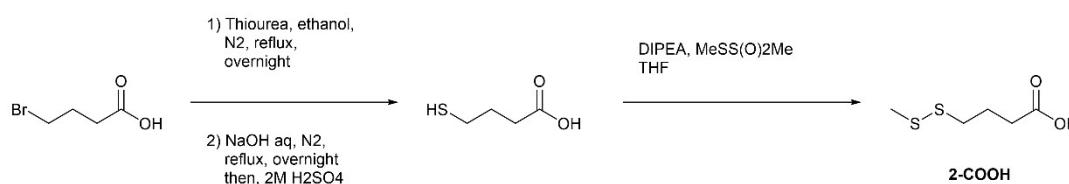

4-(methylsulfanyl)butanoic acid was prepared using a modified procedure reported by Watson *et al.*<sup>1</sup> A solution of 4-bromobutanoic acid (2.00 g, 12.0 mmol) and thiourea (1.00 g, 13.1 mmol) in ethanol (30 mL) was refluxed under N<sub>2</sub> overnight. After the ethanol was removed under reduced pressure, 5M NaOH (20 mL) was added to the flask. The solution was bubbled with N<sub>2</sub> for 30 min and refluxed overnight. The reaction mixture was then cooled to 0 °C, acidified using 2 M aq H<sub>2</sub>SO<sub>4</sub>, and extracted using CH<sub>2</sub>Cl<sub>2</sub> (20 mL  $\times$  3). The organic layers were combined and dried with MgSO<sub>4</sub>, filtered, and concentrated under reduced pressure. The crude 4-mercaptobutanoic acid was then dissolved in THF (30 mL). After the solution was bubbled with N<sub>2</sub> for 30 min, DIPEA (4.40 mL, 25.2 mmol) was added to the solution at 0 °C, followed by the addition of *S*-methyl methanethiosulfonate (1.14 mL, 12.0 mmol). The mixture was then allowed to warm up to room temperature and stirred overnight. The solvent was removed under reduced pressure. The crude product was purified by silica gel chromatography using a 1:1 mixture of ethyl acetate and *n*-hexane ramped up to 4:1 as eluent to give **2-COOH** as a colorless oil (2.00 g, quantitative yield).  $^1\text{H}$  NMR (400 MHz,  $\text{CDCl}_3$  with a few drops of  $\text{CD}_3\text{OD}$ )  $\delta$  2.76 (t,  $J = 7.2$  Hz, 2H), 2.52 (t,  $J = 7.2$  Hz, 2H), 2.41 (s, 3H), 2.06 (quint,  $J = 7.2$  Hz, 2H)

## Synthesis of 6-endo-(methylthio)disulfanyl bicyclo[2.2.1]heptane-2-endo-carboxylic acid (4-COOH)

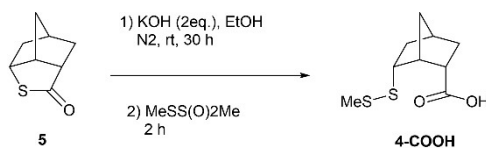

The procedure for synthesis of 6-endo-(methylthio)bicyclo[2.2.1]heptane-2-endo-carboxylic acid previously reported<sup>2</sup> was modified and used. KOH (408 mg, 7.27 mmol) was dissolved in 30 mL of ethanol and the solution was bubbled with N<sub>2</sub> for 30 min. Thiolactone **5** (560 mg, 3.64 mmol) was added to the solution at room temperature. After the reaction was stirred for 3 h at room temperature, a white precipitate had formed. *S*-Methyl methanethiosulfonate (0.340 mL, 3.64 mmol) was then added. The precipitate dissolved immediately. After being stirred for 2 h, the solvent was removed under pressure. The residue was acidified with 1 N citric acid and extracted with ethyl acetate (50 mL × 3). The combined organic layer was washed with H<sub>2</sub>O (100 mL), dried with MgSO<sub>4</sub>, filtered, and evaporated to dryness. The crude product was purified by silica gel chromatography using a 1:3 mixture of ethyl acetate and hexane as eluent to give **4-COOH** as a white solid (682 mg, 86%). The product was further purified by recrystallization from a 1:1 mixture of diethyl ether and hexane: mp 124-125 °C; <sup>1</sup>H NMR (400 MHz, CDCl<sub>3</sub>) δ 3.41 (dddd, *J* = 12.0, 6.4, 3.6, 1.2 Hz, 1H), 3.05 (br s, 1H), 2.86 (dddd, *J* = 11.2, 6.8, 4.4, 0.8 Hz, 1H), 2.42 (s, 3H), 2.35 (br s, 1H), 2.15 (ddt, *J* = 2.8, 4.4, 12.8 Hz, 1H), 1.85 – 1.73 (m, 2H), 1.59 (ddt, *J* = 1.6, 2.4, 10.4 Hz, 1H), 1.52 (dd, *J* = 1.2, 10.4 Hz, 1H), 1.09 (ddd, *J* = 2.4, 6.4, 13.2, 1H); <sup>13</sup>C NMR (400 MHz, CDCl<sub>3</sub>) δ 181.1, 52.8, 44.9, 44.4, 41.2, 37.0, 36.9, 31.2, 22.6; IR (neat) 2963, 1687, 1425, 1309, 1274, 1237, 924, 770, 740, 697 cm<sup>-1</sup>; Elemental Analysis. Calcd for C<sub>9</sub>H<sub>14</sub>O<sub>2</sub>S<sub>2</sub>: C, 49.51; H, 6.46. Found: C, 49.26; H, 6.38.

### General Procedure for synthesis of thiocarbamates

To a solution of carboxylic acid, disulfide (1.0 equiv), and triethylamine (2.2 equiv) in toluene (1.0 M) was added diphenylphosphoryl azide (1.1 equiv) under N<sub>2</sub>. The reaction mixture was stirred at room temperature for 30 min and then warmed to 65 °C for 4 h. After the solvent was removed under reduced pressure, a 5:4 mixture of 5 M HCl and dioxane (0.5 M) was added to the mixture and the solution was stirred at room temperature overnight. After the solvent was removed under reduced pressure, ethyl acetate was added to the mixture. The organic layer was washed with saturated NaHCO<sub>3</sub> and brine, dried with MgSO<sub>4</sub>, filtered, and concentrated under reduced pressure.

### Intermolecular interaction

Synthesis of a thiocarbamate from dimethyl disulfide **1** and bicyclo[2.2.1]heptane-2-endo-carboxylic acid was attempted using the general procedure. The corresponding thiocarbamate could not be

obtained based on  $^1\text{H}$  NMR analysis.

#### **Flexible intramolecular interaction**

Synthesis of a thiocarbamate from 4-(methyldisulfanyl)butanoic acid **2-COOH** was attempted using the general procedure. The corresponding thiocarbamate could not be obtained based on  $^1\text{H}$  NMR analysis.

#### **Phenyl-enforced intramolecular interaction**

Synthesis of a thiocarbamate from 2-(methyldisulfanyl)benzoic acid **3-COOH** was attempted using the general procedure. The crude product was purified by preparative thin-layer chromatography using a 1:19 mixture of methanol and chloroform as eluent to give the thiocarbamate **3-S(CO)N** (56%).  $^1\text{H}$  NMR (400 MHz,  $\text{CDCl}_3$ )  $\delta$  9.25 (bs, NH), 7.41 (d,  $J = 6.4$ , 1H), 7.28 (t,  $J = 6.0$  Hz, 1H), 7.17 (d,  $J = 6.4$  Hz, 1H), 7.13 (d,  $J = 6.8$  Hz, 1H)

#### **Norbornyl-enforced intramolecular interaction**

Synthesis of a thiocarbamate from 6-*endo*-(methyldisulfanyl)bicyclo[2.2.1]heptane-2-*endo*-carboxylic acid **4-COOH** was attempted using the general procedure. The crude product was purified by flash chromatography using a mixture of 4:1 EtOAc and *n*-hexane as eluent to give the thiocarbamate **4-S(CO)N** (65%): mp = 145-147 °C;  $^1\text{H}$  NMR (400 MHz,  $\text{CDCl}_3$ )  $\delta$  7.59 (bs, NH), 3.85 (m, 1H), 3.33 (m, 1H), 2.35-2.45 (m, 2H), 2.31 (s, 1H), 2.15 (m, 1H), 1.51- 1.60 (m, 2H), 1.21 (dt,  $J = 12.8, 3.2$  Hz, 1H);  $^{13}\text{C}$  NMR (400 MHz,  $\text{CDCl}_3$ )  $\delta$  165.9, 53.4, 42.1, 39.7 (two overlapped peaks), 39.3, 37.2, 34.9; IR (neat) 3162, 2957, 1630, 1398, 1328, 1292, 1250, 1142, 1129, 1065, 782, 724, 690  $\text{cm}^{-1}$ ; Elemental Analysis. Calcd for  $\text{C}_8\text{H}_{11}\text{NOS}$ : C, 56.78; H, 6.55; N, 8.28. Found: C, 56.38; H, 6.49; N, 8.18.

# NMR spectra

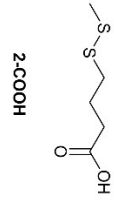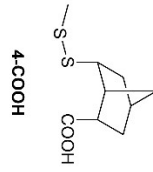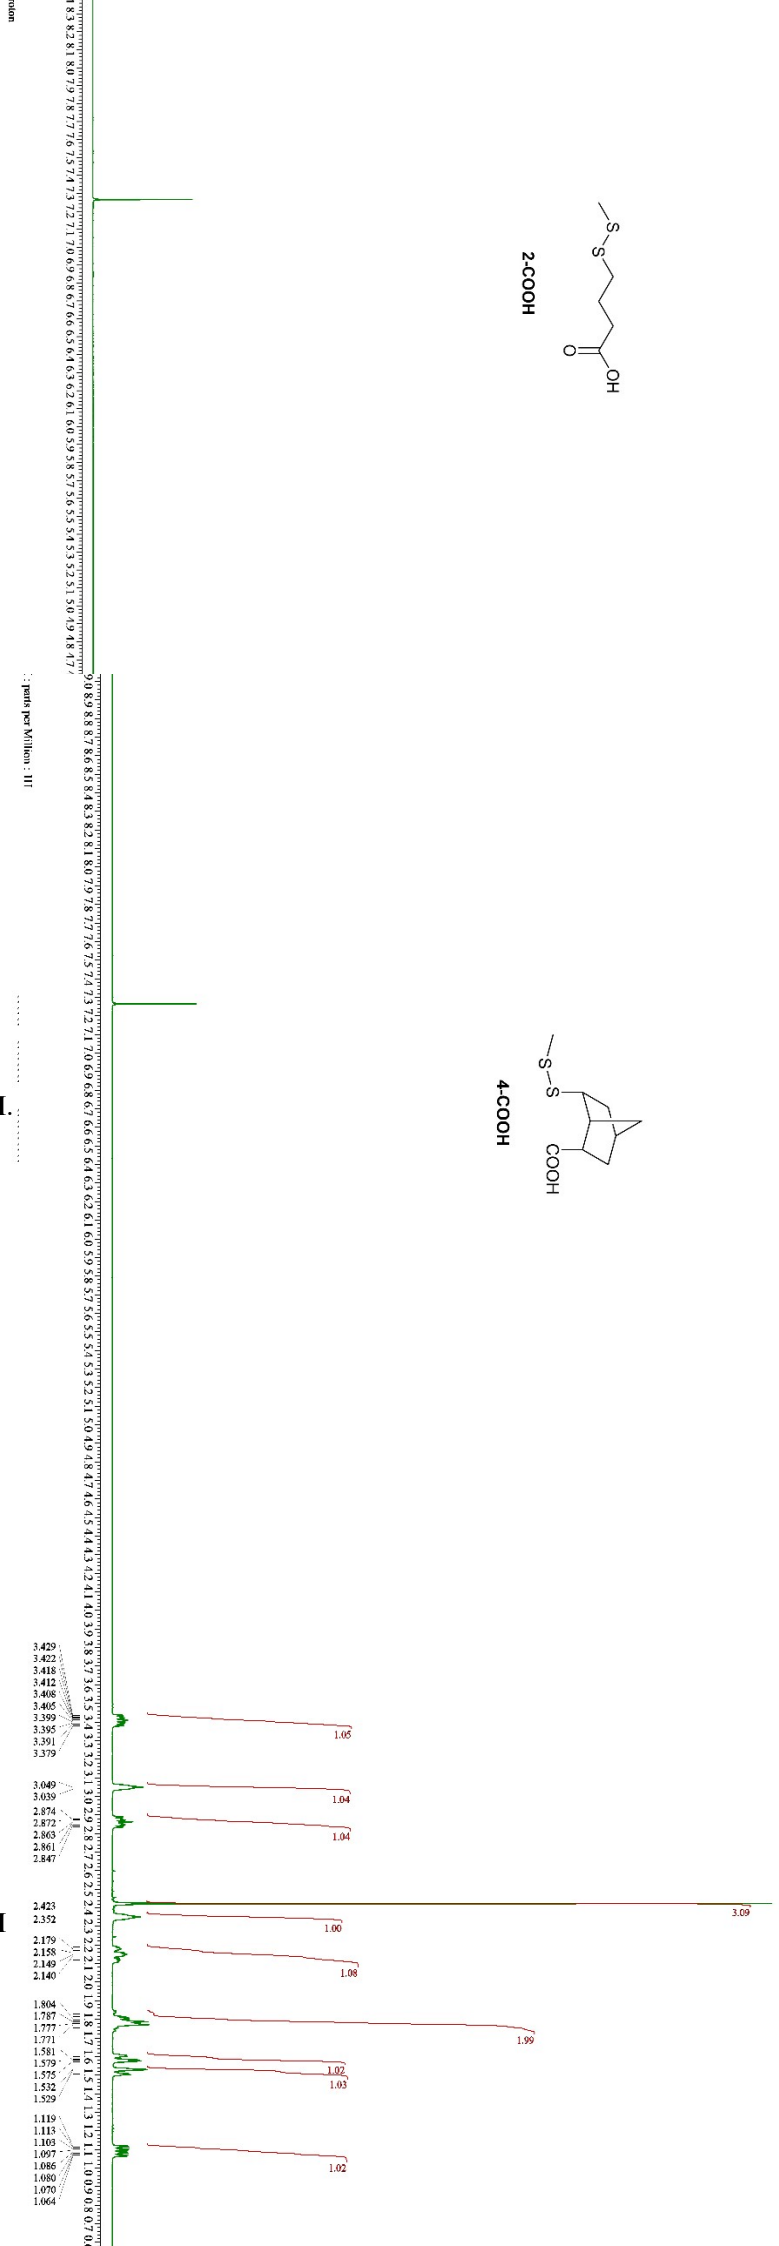

Fig. S1 <sup>1</sup>H NMR spectrum of 2-COOH.

Fig. S2 <sup>1</sup>H NMR spectrum of 4-COOH

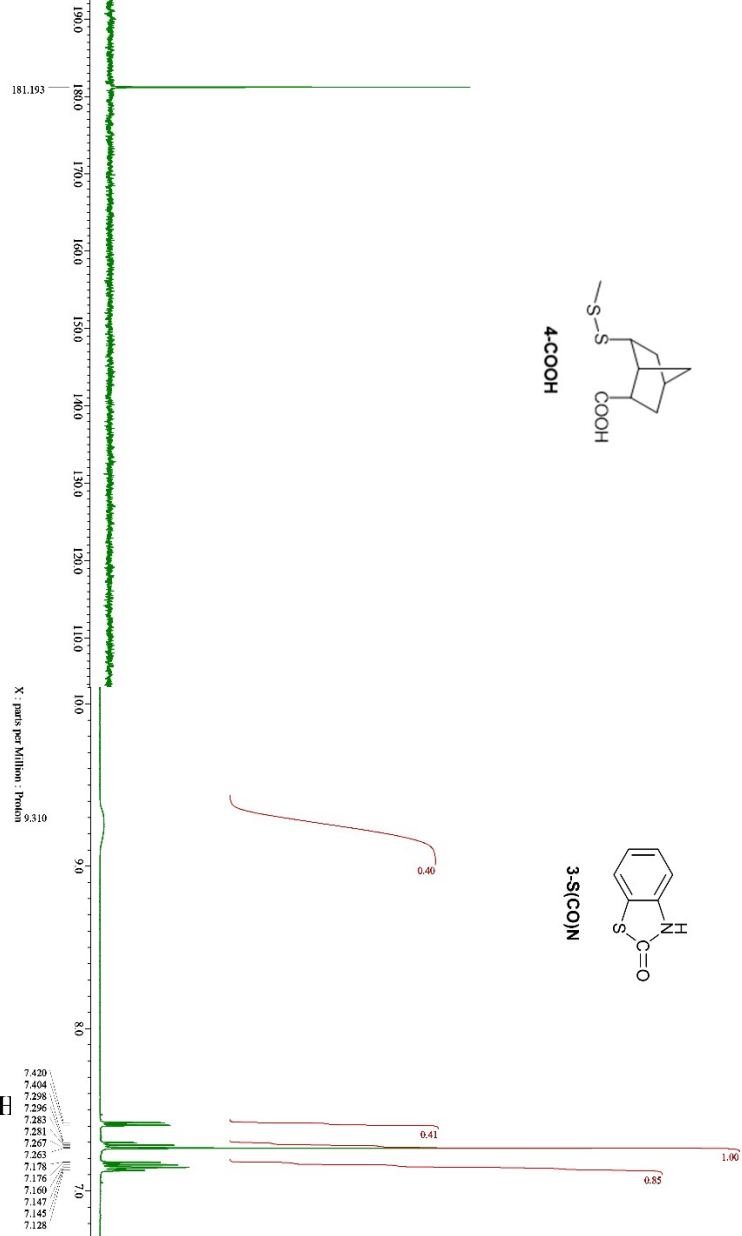

Fig. S3  $^{13}\text{C}$  NMR spectrum of 4-COOH

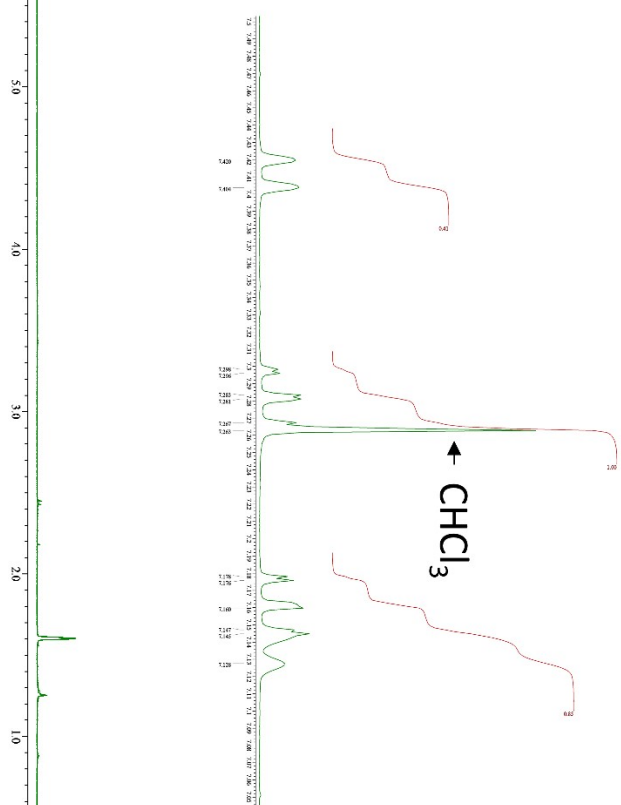

Fig. S4  $^1\text{H}$  NMR spectrum of 3-S(CO)N.

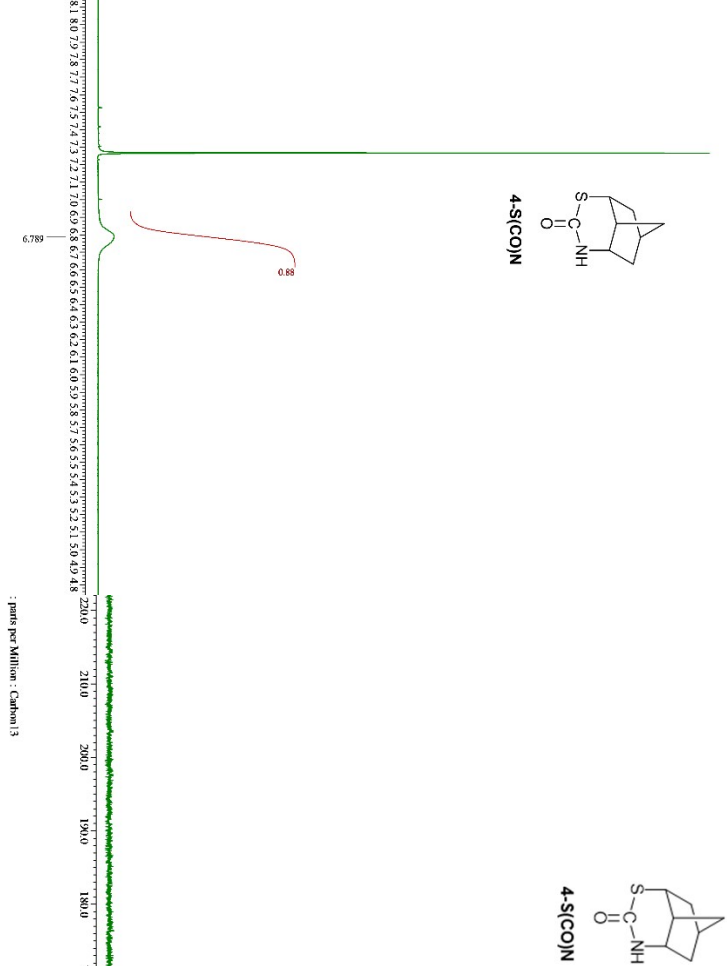

Fig. S5  $^1\text{H}$  NMR spectrum of 4-S(CO)N

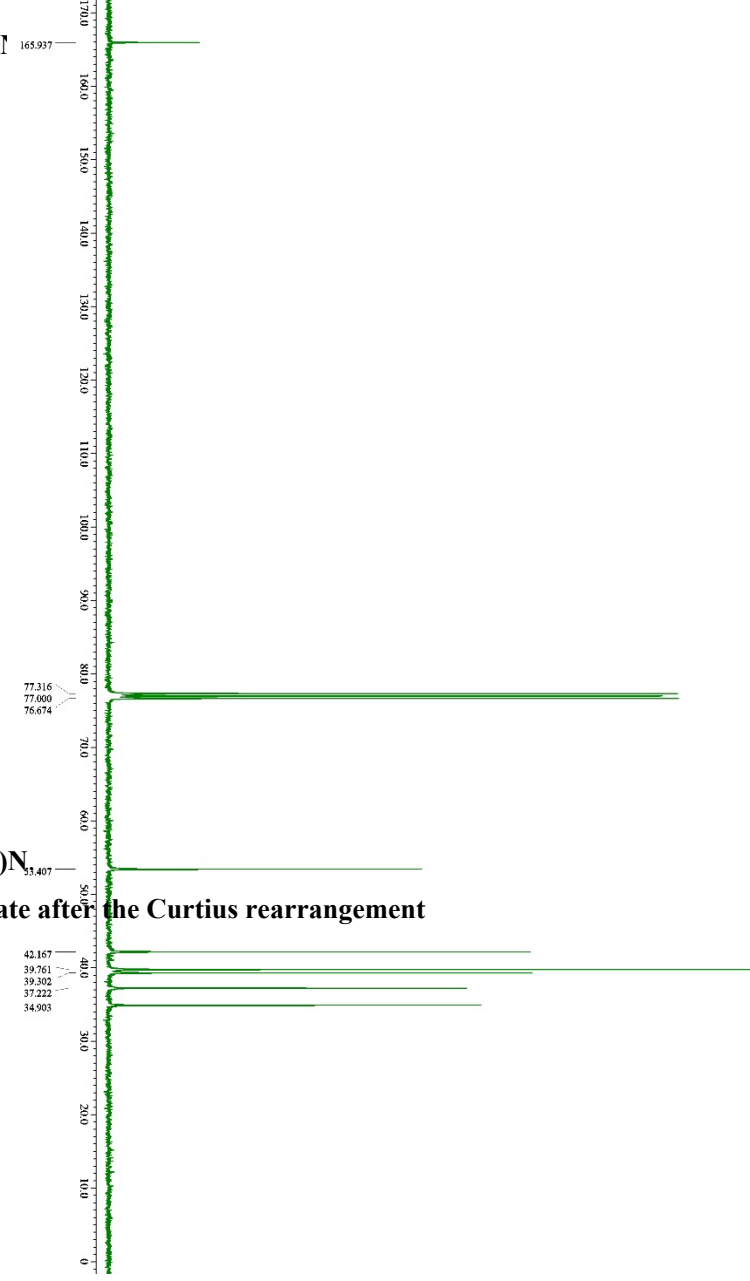

Fig. S6  $^{13}\text{C}$  NMR spectrum of 4-S(CO)N

Analysis of the isocyanate intermediate after the Curtius rearrangement



### TLC analysis

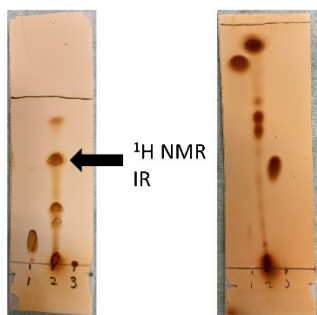

#### Left TLC

Mobile phase = 1:8 Hexane and Ethylacetate

#### Right TLC

Mobile phase = 5% Methanol in  $\text{CHCl}_3$

1. 4-COOH
2. Reaction mixture
3. 4-S(CO)N

TLCs showed **4-COOH** was consumed and **4-S(CO)N** was not produced yet after the Curtius rearrangement. The major spot was chromatographed and measured on IR and  $^1\text{H}$  NMR. IR showed an isocyanate peak.  $^1\text{H}$  NMR spectrum showed different peaks from **4-COOH** and **4-S(CO)N**.

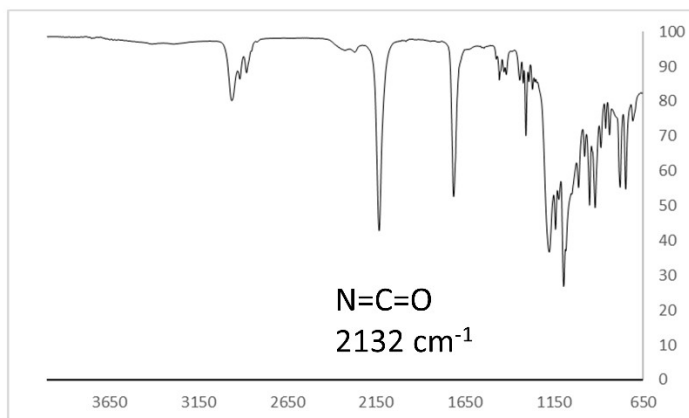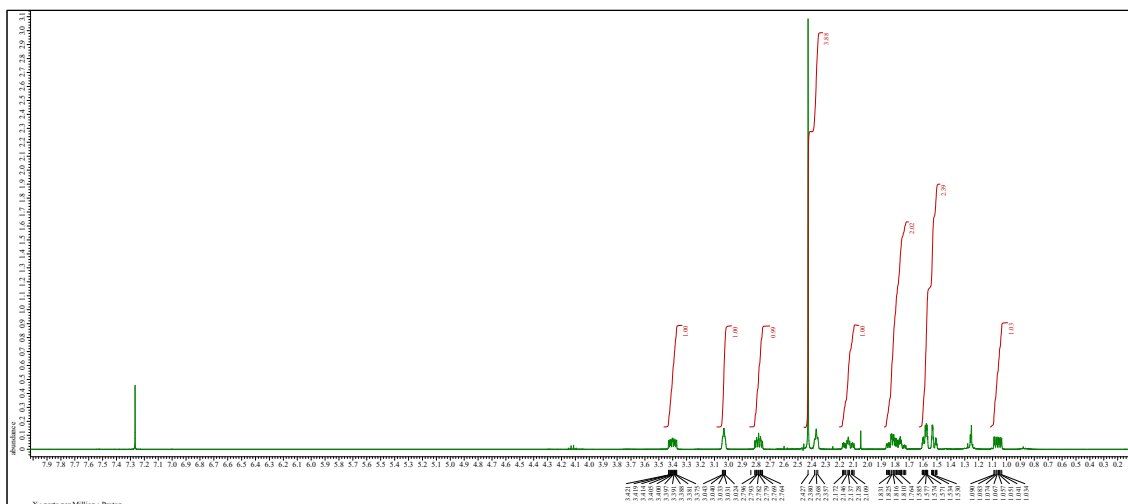

### Single Crystal X-ray Diffraction Study

A single crystal was mounted on a glass fiber and the temperature of the crystal was maintained at 100 K by means of a Rigaku cooling device with liquid nitrogen flow to within an accuracy of  $\pm 2$  K. Data reductions and empirical absorption correction using spherical harmonics, implemented in a SCALE3 ABSPACK scaling algorithm (multi-scan method)<sup>3</sup> were performed using the CrysAlis<sup>Pro</sup> software package (version 1.171.41.93a).<sup>4</sup> All the structures were solved with intrinsic phasing algorithm with SHELXT<sup>5</sup> and refined on  $F^2$  data using the full-matrix least-squares algorithm using SHELXL,<sup>6</sup> both of which were implemented in the program OLEX2 (version 1.5)<sup>7</sup> with anisotropic displacement parameters for all non-hydrogen atoms. Hydrogen atoms were placed in calculated positions with idealized geometries and refined by using a riding model and isotropic displacement parameters.

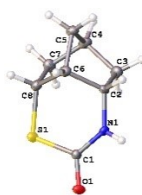

**4-S(CO)N**

|                                   |                                                                                             |
|-----------------------------------|---------------------------------------------------------------------------------------------|
| Empirical formula                 | C <sub>8</sub> H <sub>11</sub> NOS                                                          |
| Formula weight                    | 169.24                                                                                      |
| Temperature                       | 100(2) K                                                                                    |
| Crystal system                    | monoclinic                                                                                  |
| Space group                       | P2 <sub>1</sub> /c                                                                          |
| Unit cell dimensions              | a = 9.0019(4) Å   b = 7.9707(3) Å   c = 11.5272(5) Å<br>α = 90°   β = 106.536(4)°   γ = 90° |
| Volume                            | 792.89(6) Å <sup>3</sup>                                                                    |
| Z                                 | 4                                                                                           |
| Calculated density                | 1.418 g/cm <sup>3</sup>                                                                     |
| Absorption coefficient            | 0.345 μ/mm <sup>-1</sup>                                                                    |
| F(000)                            | 360                                                                                         |
| Crystal size                      | 0.41×0.22×0.16 mm <sup>3</sup>                                                              |
| 2θ range for data collection      | 4.72 to 60.628°                                                                             |
| Radiation                         | Mo K <sub>α</sub> (λ = 0.71073)                                                             |
| Index ranges                      | -11 ≤ h ≤ 9, -10 ≤ k ≤ 10, -14 ≤ l ≤ 14                                                     |
| Reflections collected             | 7728                                                                                        |
| Independent reflections           | 1975 [R <sub>int</sub> = 0.0112, R <sub>sigma</sub> = 0.0095]                               |
| Data / restraints / parameters    | 1975/0/110                                                                                  |
| Goodness-of-fit on F <sup>2</sup> | 1.032                                                                                       |
| Final R indexes [I > 2σ(I)]       | R <sub>1</sub> = 0.0409, wR <sub>2</sub> = 0.0964                                           |

Final R indexes (all data)

$R_1 = 0.0420$ ,  $wR_2 = 0.0971$

Largest diff. peak and hole

0.92 and -0.29 e  $\text{\AA}^{-3}$

---

## Computational Methods

Conformational search was carried out by Merck molecular force field (MMFF) in conjunction with Monte Carlo search method in Spartan' 18 program.<sup>8</sup> Lowest conformers within <40 kJ/mol for each compound were generated. Then, the equilibrium geometries of these conformers were determined using the semiempirical PM6 method. The resulting geometries were fully optimized at the M06-2X/6-311+G(d,p) level, and solvent effects were included by the use of PCM model in the Gaussian 09 program.<sup>9</sup> Natural bond order (NBO) analyses of all conformers were performed using NBO program as implemented in the Gaussian program package.<sup>10</sup>

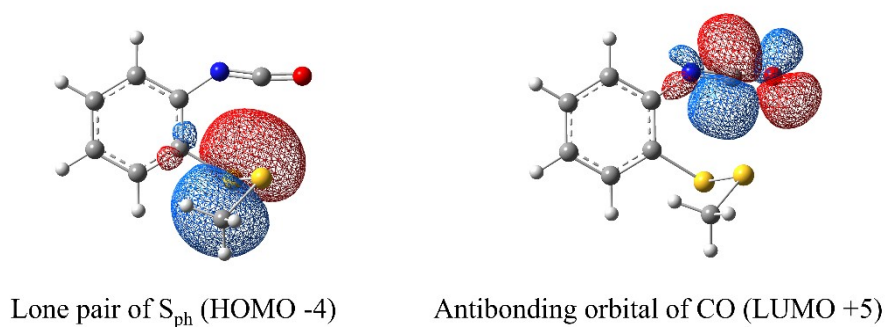

**Fig. S7** Lone pair of  $S_{ph}$  and antibonding orbital of C=O in **3-toluene**.

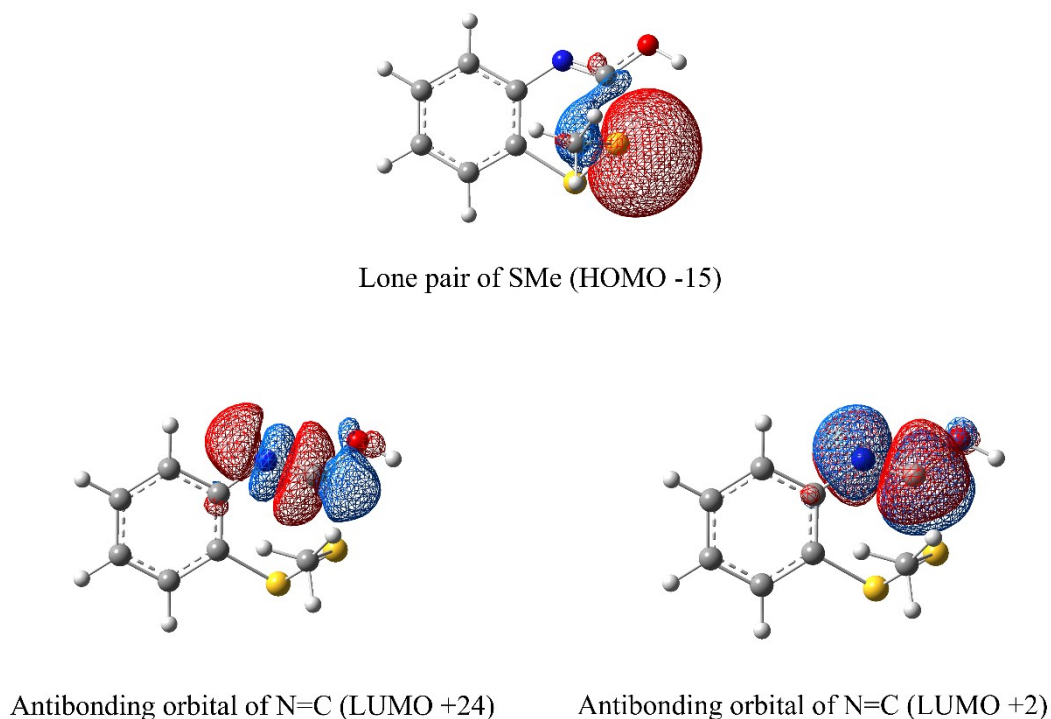

**Fig. S8** Lone pair of  $S_{Me}$  and antibonding orbital of N=C in **3-NCOH<sup>+</sup>-water**.

Cartesian coordinates calculated at M06-2X/6-311+G(d,p) level of theory

### 3-toluene

Imaginary frequencies = 0

Sum of electronic and thermal Free Energies = -1235.261062

---

| Center<br>Number | Atomic<br>Number | Atomic<br>Type | Coordinates (Angstroms) |           |           |
|------------------|------------------|----------------|-------------------------|-----------|-----------|
|                  |                  |                | X                       | Y         | Z         |
| 1                | 1                | 0              | 2.547545                | 2.072372  | -1.105738 |
| 2                | 6                | 0              | 2.312472                | 1.135019  | -0.617618 |
| 3                | 6                | 0              | 1.658506                | -1.250962 | 0.643825  |
| 4                | 6                | 0              | 1.024234                | 0.953680  | -0.117064 |
| 5                | 6                | 0              | 3.265222                | 0.134082  | -0.484929 |
| 6                | 6                | 0              | 2.943433                | -1.061462 | 0.148701  |
| 7                | 6                | 0              | 0.689080                | -0.255807 | 0.519256  |
| 8                | 1                | 0              | 4.262022                | 0.291336  | -0.878678 |
| 9                | 1                | 0              | 3.684616                | -1.843584 | 0.255741  |
| 10               | 1                | 0              | 1.390726                | -2.177518 | 1.137897  |
| 11               | 16               | 0              | -0.922456               | -0.534117 | 1.217286  |
| 12               | 16               | 0              | -2.065492               | -0.814240 | -0.511178 |
| 13               | 6                | 0              | -1.473250               | -2.449729 | -1.025748 |
| 14               | 1                | 0              | -1.681899               | -3.189591 | -0.254908 |
| 15               | 1                | 0              | -0.406053               | -2.411001 | -1.243474 |
| 16               | 1                | 0              | -2.017850               | -2.701348 | -1.936480 |
| 17               | 7                | 0              | 0.117915                | 1.996959  | -0.276565 |
| 18               | 6                | 0              | -1.042040               | 2.236761  | -0.060298 |
| 19               | 8                | 0              | -2.132909               | 2.613104  | 0.078389  |

---

### 3-water

Imaginary frequencies = 0

Sum of electronic and thermal Free Energies = -1235.265196

---

| Center<br>Number | Atomic<br>Number | Atomic<br>Type | Coordinates (Angstroms) |   |   |
|------------------|------------------|----------------|-------------------------|---|---|
|                  |                  |                | X                       | Y | Z |

---

|    |    |   |           |           |           |
|----|----|---|-----------|-----------|-----------|
| 1  | 1  | 0 | 2.574710  | 2.051700  | -1.106861 |
| 2  | 6  | 0 | 2.328232  | 1.117282  | -0.618620 |
| 3  | 6  | 0 | 1.648992  | -1.266071 | 0.640818  |
| 4  | 6  | 0 | 1.039285  | 0.945621  | -0.118581 |
| 5  | 6  | 0 | 3.271188  | 0.105936  | -0.485424 |
| 6  | 6  | 0 | 2.936424  | -1.087167 | 0.146279  |
| 7  | 6  | 0 | 0.690602  | -0.260503 | 0.516642  |
| 8  | 1  | 0 | 4.269583  | 0.253625  | -0.878516 |
| 9  | 1  | 0 | 3.669265  | -1.877210 | 0.251581  |
| 10 | 1  | 0 | 1.373139  | -2.192099 | 1.131118  |
| 11 | 16 | 0 | -0.924939 | -0.519539 | 1.212858  |
| 12 | 16 | 0 | -2.071367 | -0.799322 | -0.513496 |
| 13 | 6  | 0 | -1.526646 | -2.458578 | -1.006369 |
| 14 | 1  | 0 | -1.761039 | -3.180866 | -0.226855 |
| 15 | 1  | 0 | -0.458044 | -2.453181 | -1.218800 |
| 16 | 1  | 0 | -2.075596 | -2.702652 | -1.916244 |
| 17 | 7  | 0 | 0.136824  | 1.995213  | -0.278575 |
| 18 | 6  | 0 | -1.016380 | 2.252640  | -0.061106 |
| 19 | 8  | 0 | -2.104885 | 2.642624  | 0.080372  |

-----

### 3-NCOH<sup>+</sup>-water

Imaginary frequencies = 0

Sum of electronic and thermal Free Energies = -1235.622149

-----

| Center<br>Number | Atomic<br>Number | Atomic<br>Type | Coordinates (Angstroms) |           |           |
|------------------|------------------|----------------|-------------------------|-----------|-----------|
|                  |                  |                | X                       | Y         | Z         |
| 1                | 1                | 0              | -1.773728               | 2.667984  | 0.295896  |
| 2                | 6                | 0              | -1.902759               | 1.601086  | 0.162364  |
| 3                | 6                | 0              | -2.176032               | -1.153043 | -0.178662 |
| 4                | 6                | 0              | -0.789099               | 0.843967  | -0.207209 |
| 5                | 6                | 0              | -3.134647               | 0.993336  | 0.349316  |
| 6                | 6                | 0              | -3.275904               | -0.381103 | 0.168411  |
| 7                | 6                | 0              | -0.937601               | -0.541308 | -0.372414 |
| 8                | 1                | 0              | -3.989125               | 1.593803  | 0.635047  |

|    |    |   |           |           |           |
|----|----|---|-----------|-----------|-----------|
| 9  | 1  | 0 | -4.238224 | -0.856005 | 0.311090  |
| 10 | 1  | 0 | -2.270699 | -2.225305 | -0.299596 |
| 11 | 16 | 0 | 0.411342  | -1.562971 | -0.891051 |
| 12 | 16 | 0 | 1.911267  | -0.694337 | 0.260995  |
| 13 | 6  | 0 | 1.297865  | -0.657006 | 1.965759  |
| 14 | 1  | 0 | 0.284067  | -0.263851 | 1.994076  |
| 15 | 1  | 0 | 1.992360  | -0.023490 | 2.516508  |
| 16 | 1  | 0 | 1.344789  | -1.684226 | 2.321444  |
| 17 | 7  | 0 | 0.414843  | 1.527176  | -0.406305 |
| 18 | 6  | 0 | 1.565656  | 1.075590  | -0.272073 |
| 19 | 8  | 0 | 2.652983  | 1.779720  | -0.519383 |
| 20 | 1  | 0 | 3.476184  | 1.290908  | -0.387323 |

**4-toluene**

Imaginary frequencies = 0

Sum of electronic and thermal Free Energies = -1276.889664

| Center<br>Number | Atomic<br>Number | Atomic<br>Type | Coordinates (Angstroms) |           |           |
|------------------|------------------|----------------|-------------------------|-----------|-----------|
|                  |                  |                | X                       | Y         | Z         |
| 1                | 1                | 0              | -2.254251               | -2.715278 | 1.116433  |
| 2                | 6                | 0              | -1.309617               | -2.418111 | 0.654654  |
| 3                | 6                | 0              | -1.452444               | -2.006753 | -0.825547 |
| 4                | 6                | 0              | -0.036994               | -1.491392 | -1.139270 |
| 5                | 6                | 0              | 0.408087                | -0.862652 | 0.212424  |
| 6                | 6                | 0              | -0.825610               | -1.030721 | 1.122423  |
| 7                | 1                | 0              | -0.567876               | -3.202932 | 0.814762  |
| 8                | 1                | 0              | -1.804799               | -2.779417 | -1.507267 |
| 9                | 1                | 0              | 0.631584                | -2.307765 | -1.418058 |
| 10               | 1                | 0              | -0.031463               | -0.760099 | -1.949366 |
| 11               | 1                | 0              | 1.210812                | -1.456154 | 0.653816  |
| 12               | 1                | 0              | -0.601213               | -0.913930 | 2.182042  |
| 13               | 6                | 0              | -2.023514               | -0.182098 | 0.662019  |
| 14               | 1                | 0              | -2.835201               | -0.348424 | 1.374376  |
| 15               | 6                | 0              | -2.393576               | -0.792174 | -0.722495 |

|    |    |   |           |           |           |
|----|----|---|-----------|-----------|-----------|
| 16 | 1  | 0 | -2.228791 | -0.075396 | -1.529456 |
| 17 | 1  | 0 | -3.443548 | -1.089446 | -0.739250 |
| 18 | 16 | 0 | 1.088120  | 0.839500  | 0.110743  |
| 19 | 16 | 0 | 2.959048  | 0.405422  | -0.680299 |
| 20 | 6  | 0 | 3.899775  | 0.022681  | 0.828051  |
| 21 | 1  | 0 | 4.913743  | -0.223550 | 0.510320  |
| 22 | 1  | 0 | 3.468588  | -0.833826 | 1.345245  |
| 23 | 1  | 0 | 3.921868  | 0.888288  | 1.487242  |
| 24 | 7  | 0 | -1.760842 | 1.236861  | 0.656765  |
| 25 | 6  | 0 | -2.051934 | 2.246686  | 0.091937  |
| 26 | 8  | 0 | -2.261661 | 3.291043  | -0.391309 |

---

#### 4-water

Imaginary frequencies = 0

Sum of electronic and thermal Free Energies = -1276.895329

---

| Center<br>Number | Atomic<br>Number | Atomic<br>Type | Coordinates (Angstroms) |           |           |
|------------------|------------------|----------------|-------------------------|-----------|-----------|
|                  |                  |                | X                       | Y         | Z         |
| 1                | 1                | 0              | -2.118361               | -2.747019 | 1.223398  |
| 2                | 6                | 0              | -1.180083               | -2.435997 | 0.758597  |
| 3                | 6                | 0              | -1.311716               | -2.144912 | -0.750407 |
| 4                | 6                | 0              | 0.079950                | -1.575693 | -1.078582 |
| 5                | 6                | 0              | 0.462182                | -0.830970 | 0.232154  |
| 6                | 6                | 0              | -0.781728               | -0.993230 | 1.129136  |
| 7                | 1                | 0              | -0.400743               | -3.163428 | 0.992269  |
| 8                | 1                | 0              | -1.605654               | -2.985507 | -1.376908 |
| 9                | 1                | 0              | 0.797058                | -2.372054 | -1.285306 |
| 10               | 1                | 0              | 0.059229                | -0.905289 | -1.939919 |
| 11               | 1                | 0              | 1.280599                | -1.349886 | 0.733138  |
| 12               | 1                | 0              | -0.586422               | -0.788811 | 2.181152  |
| 13               | 6                | 0              | -2.008579               | -0.246788 | 0.582282  |
| 14               | 1                | 0              | -2.828519               | -0.382747 | 1.290318  |
| 15               | 6                | 0              | -2.320739               | -0.982848 | -0.755899 |
| 16               | 1                | 0              | -2.185623               | -0.319708 | -1.612142 |



|    |    |   |           |           |           |
|----|----|---|-----------|-----------|-----------|
| 17 | 1  | 0 | -3.351393 | -1.340143 | -0.756987 |
| 18 | 16 | 0 | 1.067394  | 0.890233  | 0.021738  |
| 19 | 16 | 0 | 2.986903  | 0.499013  | -0.674884 |
| 20 | 6  | 0 | 3.891368  | 0.214892  | 0.877244  |
| 21 | 1  | 0 | 4.922602  | -0.005195 | 0.598823  |
| 22 | 1  | 0 | 3.475566  | -0.637497 | 1.412721  |
| 23 | 1  | 0 | 3.861081  | 1.106895  | 1.499665  |
| 24 | 7  | 0 | -1.800072 | 1.175282  | 0.444317  |
| 25 | 6  | 0 | -2.265696 | 2.203965  | 0.075819  |
| 26 | 8  | 0 | -2.622179 | 3.273121  | -0.255271 |

-----

#### 4-SSH<sup>+</sup>-water

Imaginary frequencies = 0

Sum of electronic and thermal Free Energies = -1277.275710

-----

| Center<br>Number | Atomic<br>Number | Atomic<br>Type | Coordinates (Angstroms) |           |           |
|------------------|------------------|----------------|-------------------------|-----------|-----------|
|                  |                  |                | X                       | Y         | Z         |
| 1                | 1                | 0              | 2.601174                | -1.313707 | -1.958225 |
| 2                | 6                | 0              | 1.936635                | -1.628664 | -1.152074 |
| 3                | 6                | 0              | 2.484795                | -1.315962 | 0.252988  |
| 4                | 6                | 0              | 1.290815                | -1.701867 | 1.144293  |
| 5                | 6                | 0              | 0.083465                | -1.331204 | 0.232523  |
| 6                | 6                | 0              | 0.709698                | -0.700495 | -1.023019 |
| 7                | 1                | 0              | 1.667609                | -2.676398 | -1.293457 |
| 8                | 1                | 0              | 3.407382                | -1.819701 | 0.532600  |
| 9                | 1                | 0              | 1.266797                | -2.770253 | 1.357456  |
| 10               | 1                | 0              | 1.297526                | -1.166423 | 2.096053  |
| 11               | 1                | 0              | -0.489129               | -2.212720 | -0.049981 |
| 12               | 1                | 0              | 0.032760                | -0.655435 | -1.874844 |
| 13               | 6                | 0              | 1.421447                | 0.629451  | -0.725561 |
| 14               | 1                | 0              | 1.809043                | 1.017256  | -1.668383 |
| 15               | 6                | 0              | 2.589407                | 0.218259  | 0.219569  |
| 16               | 1                | 0              | 2.474332                | 0.666949  | 1.207455  |
| 17               | 1                | 0              | 3.541703                | 0.547068  | -0.196870 |

|    |    |   |           |           |           |
|----|----|---|-----------|-----------|-----------|
| 18 | 16 | 0 | -1.105726 | -0.271040 | 1.157001  |
| 19 | 16 | 0 | -2.606610 | 0.254095  | -0.190799 |
| 20 | 6  | 0 | -3.089703 | -1.356668 | -0.871612 |
| 21 | 1  | 0 | -3.946133 | -1.123919 | -1.505725 |
| 22 | 1  | 0 | -3.402747 | -2.037551 | -0.082579 |
| 23 | 1  | 0 | -2.298382 | -1.780054 | -1.485392 |
| 24 | 7  | 0 | 0.534177  | 1.627568  | -0.158874 |
| 25 | 6  | 0 | 0.452815  | 2.817611  | -0.066055 |
| 26 | 8  | 0 | 0.268075  | 3.960992  | 0.084507  |
| 27 | 1  | 0 | -1.724634 | -1.267655 | 1.832403  |

-----

#### 4-NCOH<sup>+</sup>-water

Imaginary frequencies = 0

Sum of electronic and thermal Free Energies = -1277.258138

-----

| Center<br>Number | Atomic<br>Number | Atomic<br>Type | Coordinates (Angstroms) |           |           |
|------------------|------------------|----------------|-------------------------|-----------|-----------|
|                  |                  |                | X                       | Y         | Z         |
| 1                | 1                | 0              | 3.224163                | -1.147879 | -1.572414 |
| 2                | 6                | 0              | 2.497467                | -1.379435 | -0.791994 |
| 3                | 6                | 0              | 2.817626                | -0.703755 | 0.552901  |
| 4                | 6                | 0              | 1.554926                | -1.014252 | 1.382357  |
| 5                | 6                | 0              | 0.453870                | -1.063345 | 0.284505  |
| 6                | 6                | 0              | 1.163415                | -0.634312 | -0.999935 |
| 7                | 1                | 0              | 2.368132                | -2.461205 | -0.724456 |
| 8                | 1                | 0              | 3.738229                | -1.016742 | 1.040724  |
| 9                | 1                | 0              | 1.614281                | -1.985344 | 1.872623  |
| 10               | 1                | 0              | 1.372777                | -0.261498 | 2.152521  |
| 11               | 1                | 0              | 0.012835                | -2.055577 | 0.184065  |
| 12               | 1                | 0              | 0.605618                | -0.858767 | -1.907536 |
| 13               | 6                | 0              | 1.625820                | 0.831490  | -0.884337 |
| 14               | 1                | 0              | 2.005870                | 1.154701  | -1.852813 |
| 15               | 6                | 0              | 2.791135                | 0.777785  | 0.157163  |
| 16               | 1                | 0              | 2.604214                | 1.441159  | 1.002592  |
| 17               | 1                | 0              | 3.729586                | 1.074983  | -0.310931 |

|    |    |   |           |           |           |
|----|----|---|-----------|-----------|-----------|
| 18 | 16 | 0 | -1.005113 | -0.044112 | 0.700082  |
| 19 | 16 | 0 | -2.387917 | -0.488684 | -0.803347 |
| 20 | 6  | 0 | -3.670955 | -1.265671 | 0.224699  |
| 21 | 1  | 0 | -4.462096 | -1.501739 | -0.488239 |
| 22 | 1  | 0 | -4.046246 | -0.564622 | 0.965455  |
| 23 | 1  | 0 | -3.302084 | -2.181776 | 0.677732  |
| 24 | 7  | 0 | 0.633324  | 1.824306  | -0.501942 |
| 25 | 6  | 0 | -0.426061 | 1.630461  | 0.099846  |
| 26 | 8  | 0 | -1.321364 | 2.582953  | 0.357153  |
| 27 | 1  | 0 | -1.882613 | 2.381470  | 1.118053  |

---

## References

- 1 L. M. Miller, W.-J. Keune, D. Castagna, L. C. Young, E. L. Duffy, F. Potjewyd, F. Salgado-Polo, P. E. García, D. Semaan, J. M. Pritchard, A. Perrakis, S. J. F. Macdonald, C. Jamieson, A. J. B. Watson, *J. Med. Chem.*, 2017, **60**, 722-748
- 2 R. S. Glass, J. R. Duchek, U. D. G. Prabhu, W. N. Setzer, G. S. Wilson, *J. Org. Chem.*, 1980, **45**, 3640-3646
- 3 SCALE3 ABSPACK, version 1.0.4; gui: 1.03; An oxford diffraction program; Oxford Diffraction Ltd.: Abingdon, UK, 2005.
- 4 Rigaku Oxford Diffraction, CrysAlisPro Software system, version 1.171.41.93a; Rigaku Corporation, Oxford, UK, 2020.
- 5 G. M. Sheldrick, *Acta Crystallogr. Sect. A Found. Adv.*, 2015, **71**, 3–8.
- 6 G. M. Sheldrick, *Acta Crystallogr. Sect. C Struct. Chem.*, 2015, **71**, 3–8.
- 7 O. V. Dolomanov, L. J. Bourhis, R. J. Gildea, J. A. K. Howard and H. Puschmann, *J. Appl. Crystallogr.*, 2009, **42**, 339–341.
- 8 Spartan 18; Wavefunction Inc., Irvine, CA.
- 9 Gaussian 09, Revision A.02, M. J. Frisch, G. W. Trucks, H. B. Schlegel, G. E. Scuseria, M. A. Robb, J. R. Cheeseman, G. Scalmani, V. Barone, B. Mennucci, G. A. Petersson, H. Nakatsuji, M. Caricato, X. Li, H. P. Hratchian, A. F. Izmaylov, J. Bloino, G. Zheng, J. L. Sonnenberg, M. Hada, M. Ehara, K. Toyota, R. Fukuda, J. Hasegawa, M. Ishida, T. Nakajima, Y. Honda, O. Kitao, H. Nakai, T. Vreven, J. A. Montgomery, Jr., J. E. Peralta, F. Ogliaro, M. Bearpark, J. J. Heyd, E. Brothers, K. N. Kudin, V. N. Staroverov, R. Kobayashi, J. Normand, K. Raghavachari, A. Rendell, J. C. Burant, S. S. Iyengar, J. Tomasi, M. Cossi, N. Rega, J. M. Millam, M. Klene, J. E. Knox, J. B. Cross, V. Bakken, C. Adamo, J. Jaramillo, R. Gomperts, R. E. Stratmann, O. Yazyev, A. J. Austin, R. Cammi, C. Pomelli, J. W. Ochterski, R. L. Martin, K. Morokuma, V. G. Zakrzewski, G. A. Voth, P. Salvador, J. J. Dannenberg, S. Dapprich, A. D. Daniels, O. Farkas, J. B. Foresman, J. V. Ortiz, J. Cioslowski, and D. J. Fox, Gaussian, Inc., Wallingford CT, 2009.
- 10 E. D. Glendening, A. E. Reed, J. E. Carpenter, F. Weinhold, NBO, version 3.1, 1992
